# Supplementary material for: Female adipose tissue-specific Bscl2 knockout mice develop only moderate metabolic dysfunction when housed at thermoneutrality and fed a high-fat diet
Source: PubMed Central journal article supplement (PMC6294754; doi:10.1038/s41598-018-36078-9), 2018-12-14
Supplement: 41598_2018_36078_MOESM1_ESM.pdf [file 41598_2018_36078_MOESM1_ESM.pdf]

# Female adipose tissue-specific *Bsc12* knockout mice develop only moderate metabolic dysfunction when housed at thermoneutrality and fed a high-fat diet

George D. Mcilroy, Sharon E. Mitchell, Weiping Han, Mirela Delibegović, Justin J. Rochford

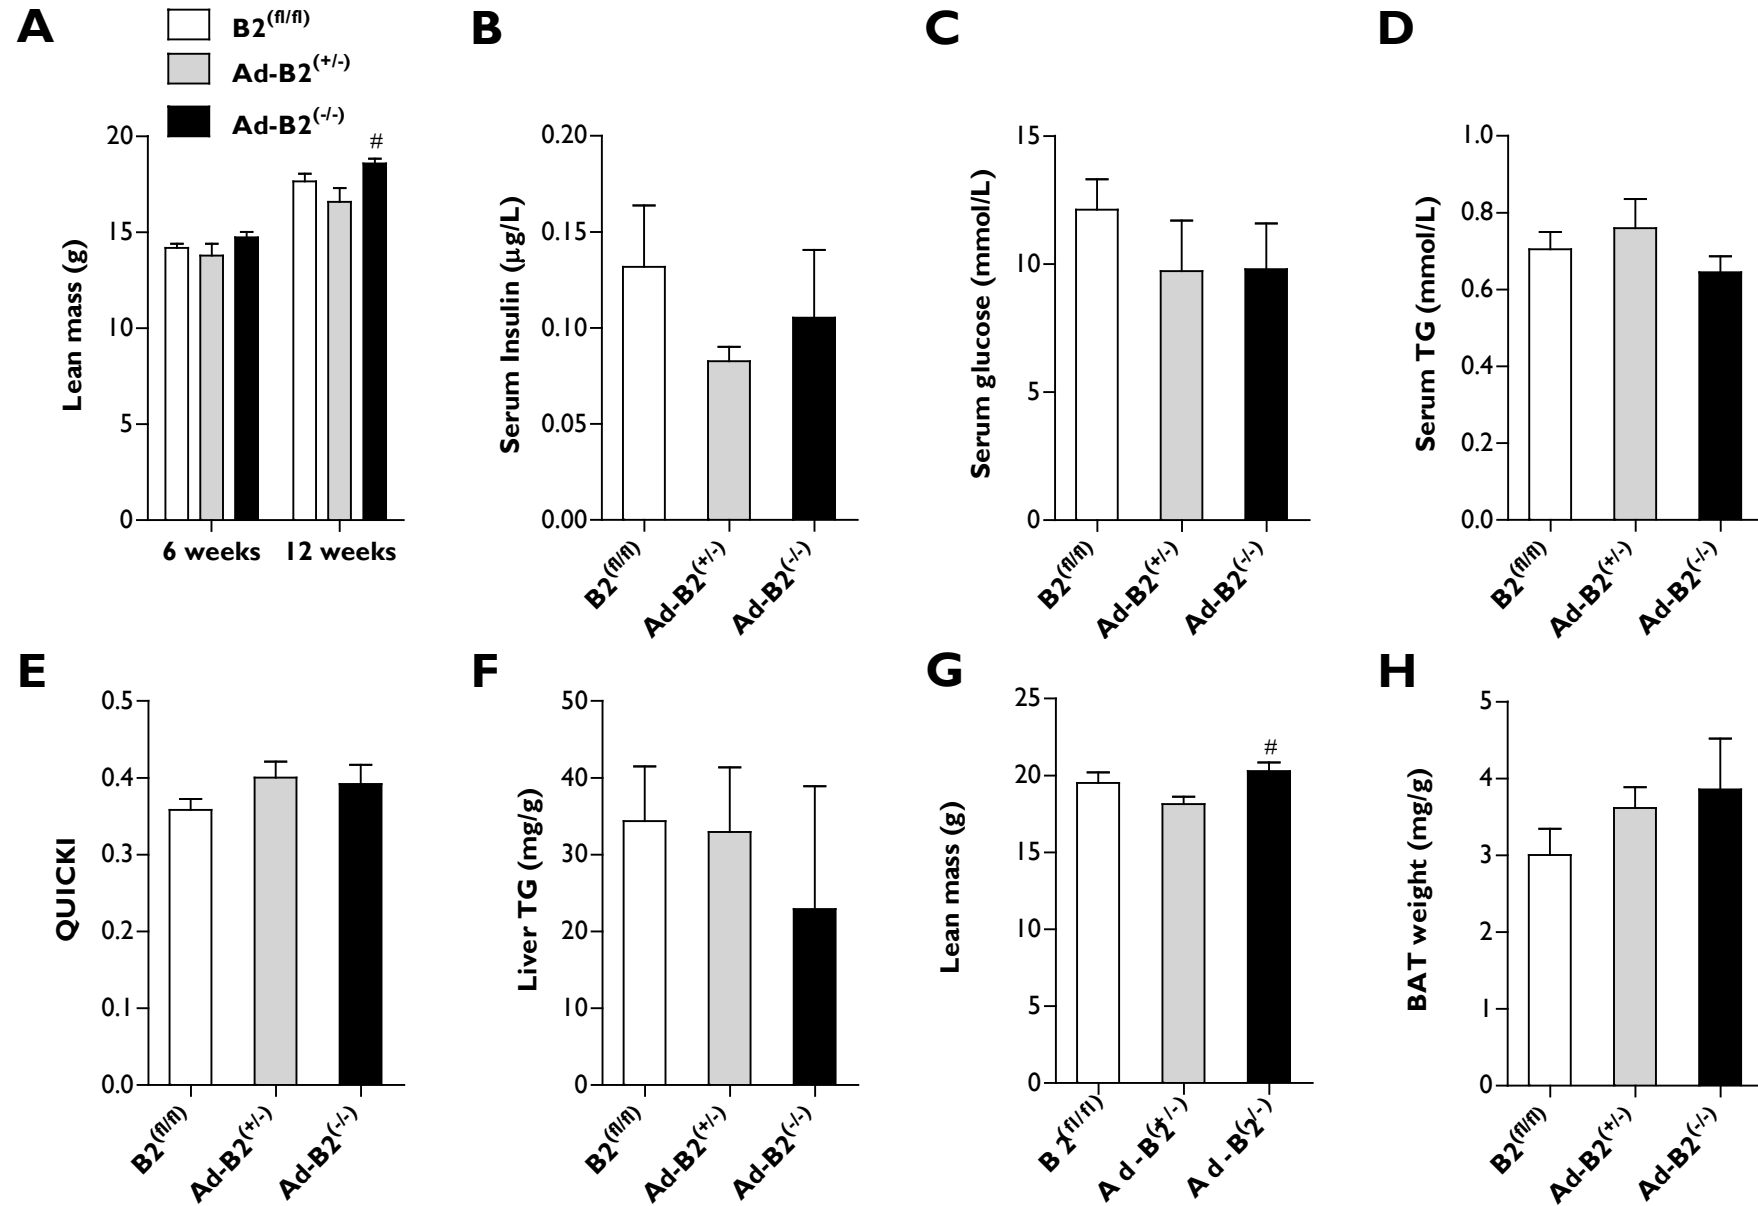

# Female adipose tissue-specific *Bsc12* knockout mice develop only moderate metabolic dysfunction when housed at thermoneutrality and fed a high-fat diet

George D. Mcilroy, Sharon E. Mitchell, Weiping Han, Mirela Delibegović, Justin J. Rochford

**Supplementary figure 1.** (A) Absolute lean mass levels assessed by Echo-MRI in B2<sup>(fl/fl)</sup>, Ad-B2<sup>(+/-)</sup> and Ad-B2<sup>(-/-)</sup> mice at six and twelve weeks of age (n = 4-8), #p<0.05 vs Ad-B2<sup>(+/-)</sup>. Five hour fasted circulating serum levels of insulin (B), glucose (C), triglyceride (D) and quantitative sensitivity check index analysis (E) in sixteen week old B2<sup>(fl/fl)</sup>, Ad-B2<sup>(+/-)</sup> and Ad-B2<sup>(-/-)</sup> female mice housed at standard housing temperatures (21°C) and fed a chow diet (n = 4). (F) Liver triglyceride levels normalised to tissue weight in five hour fasted B2<sup>(fl/fl)</sup>, Ad-B2<sup>(+/-)</sup> and Ad-B2<sup>(-/-)</sup> at sixteen weeks of age (n = 4). (G) Absolute lean mass levels assessed by DEXA in B2<sup>(fl/fl)</sup>, Ad-B2<sup>(+/-)</sup> and Ad-B2<sup>(-/-)</sup> mice after eight weeks at thermoneutrality (n = 5-6), #p<0.05 vs Ad-B2<sup>(+/-)</sup>. (H) BAT weight normalised to body weight in twenty-eight week old B2<sup>(fl/fl)</sup>, Ad-B2<sup>(+/-)</sup> and Ad-B2<sup>(-/-)</sup> female mice housed at thermoneutrality (30°C) and fed a high-fat diet for four weeks (n = 4-6). All data are presented as the mean ± SEM.
